# Supplementary material
Source: PubMed Central journal article supplement (PMC3024040)

**Supplemental Figure 1.** RNA levels of the BCKDC subunits and the kinase of the BCKDC (BDK) in phenylbutyrate treated vs. untreated mouse muscle and livers.

Average  $\pm$  SEM is shown as fold increase over  $\beta$ 2-microglobulin.

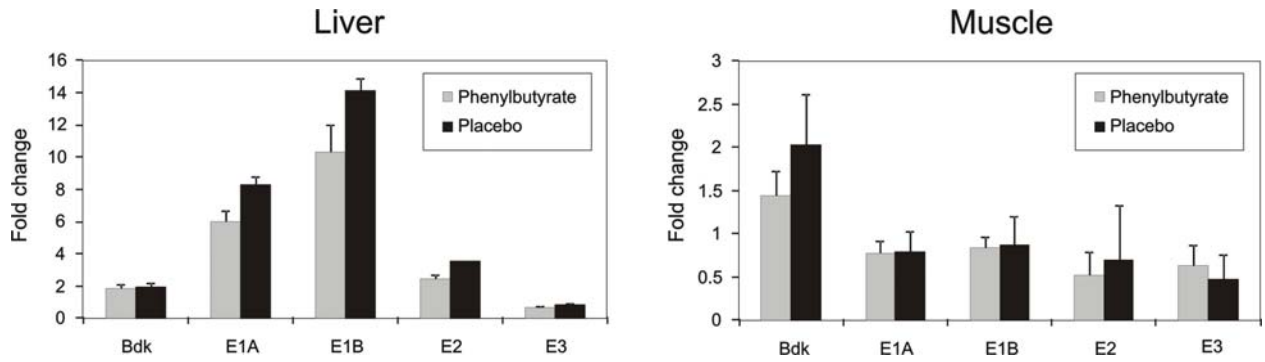

Supplement: supp_ddq507_ddq507supp.pdf [file supp_ddq507_ddq507supp.pdf]
